# Supplementary material for: Reconnaissance automatique de parole telephonique : adaptation au g.s.m
Source: Royal Society of Chemistry journal article supplement (doi:10.1039/c5cp04493f), 1997-01-01
Supplement: c5cp04493f1.pdf [file c5cp04493f1.pdf]

## Supporting Information

### **Nickel-supported Carbon Nitride Photocatalyst Combined with Organic Dye for Visible-light-driven Hydrogen Evolution from Water**

Kohsuke Mori,<sup>a,b\*</sup> Taiki Itoh,<sup>a</sup> Hiroki Kakudo,<sup>b</sup> Tomoyuki Iwamoto,<sup>c</sup>  
Yoichi Masui,<sup>c</sup> Makoto Onaka,<sup>c</sup> and Hiromi Yamashita<sup>a,b\*</sup>

<sup>a</sup> *Division of Materials and Manufacturing Science, Graduate School of Engineering, Osaka University, 2-1 Yamada-oka, Suita, Osaka 565-0871, Japan.*

*Fax & Tel: +81-6-6879-7460, +81-6-6879-7457*

*E-mail: mori@mat.eng.osaka-u.ac.jp, yamashita@mat.eng.osaka-u.ac.jp*

<sup>b</sup> *Elements Strategy Initiative for Catalysts & Batteries ESICB,*

*Kyoto University, Katsura, Kyoto 615-8520, Japan.*

*Department of Chemistry, Graduate School of Arts and Sciences, The University of Tokyo, 3-8-1 Komaba, Meguro-ku, Tokyo 153-8902 (Japan)*

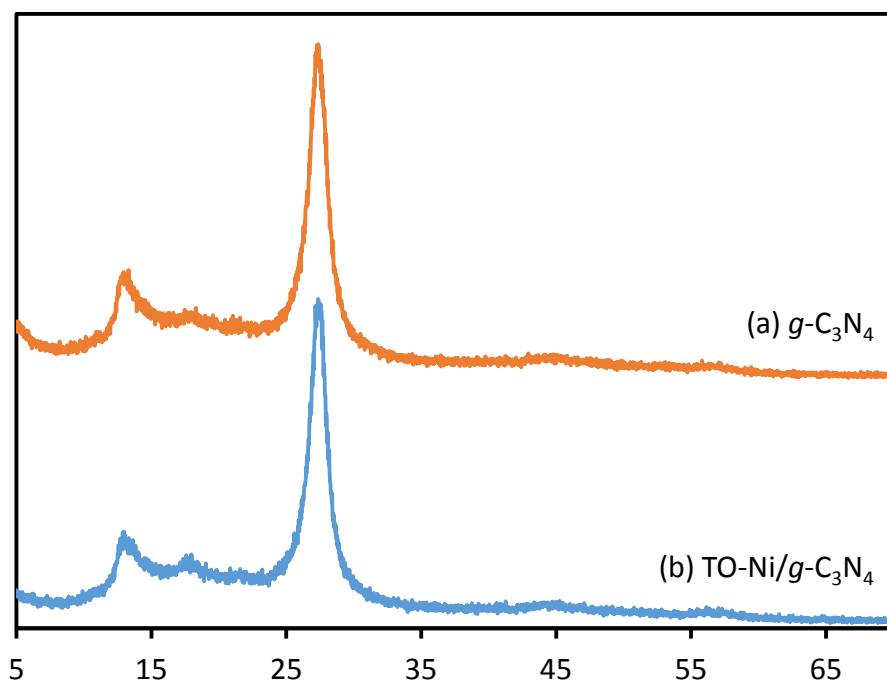

**Figure S1.** XRD Pattern of (a)  $g\text{-C}_3\text{N}_4$  and (b)  $\text{TO-Ni}/g\text{-C}_3\text{N}_4$  (TO:  $2.5 \mu\text{mol}\cdot\text{g}^{-1}$ , Ni: 0.25 wt%).

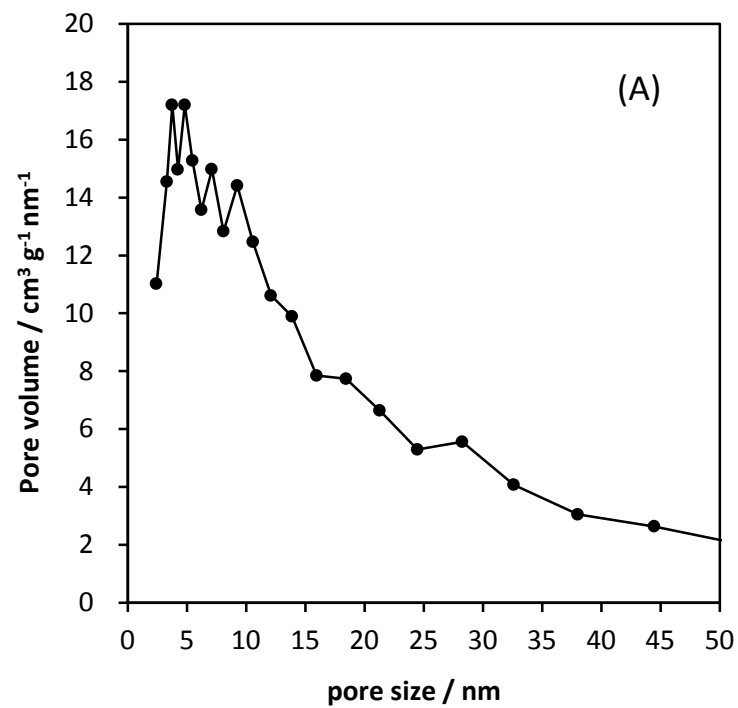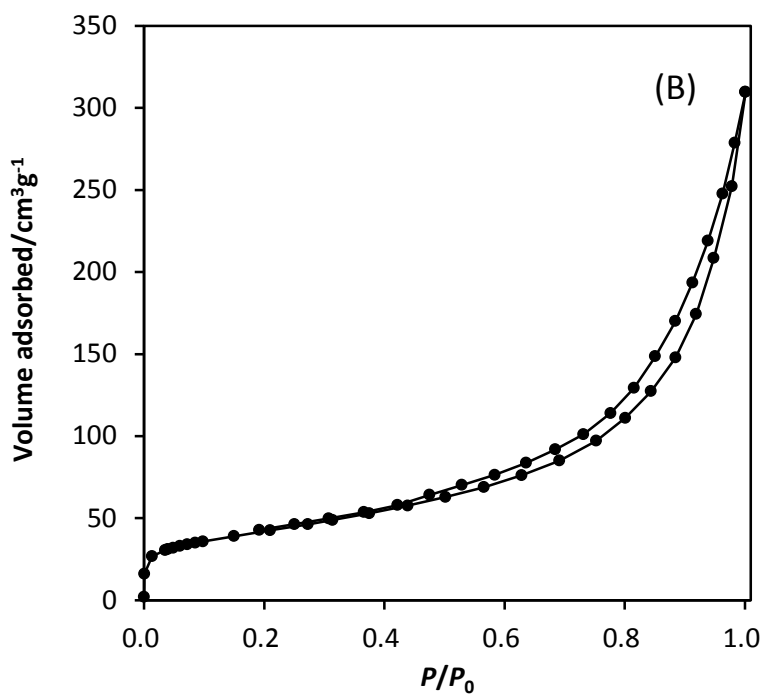

**Figure S2.** (A) DH Pore size distribution and (B) N<sub>2</sub>-adsorption-desorption isotherm of nanoC<sub>3</sub>N<sub>4</sub>.
